# Supplementary material for: Neuregulin-Induced HER3 Activation Drives Migration in Head and Neck squamous cell carcinoma via HER2 and FAK Signaling Pathways
Source: Research Square preprint supplement (doi:10.21203/rs.3.rs-5893350/v1), 2025-04-03
Supplement: Supplementary file 1 [file 29029cfd09120e527dd0d36a.pdf]

# Original image of blots: Figure 2b

Note that the membranes used in the experiments were cut and used as experimental results, so most of the original Western blot results are cut sections from the film.

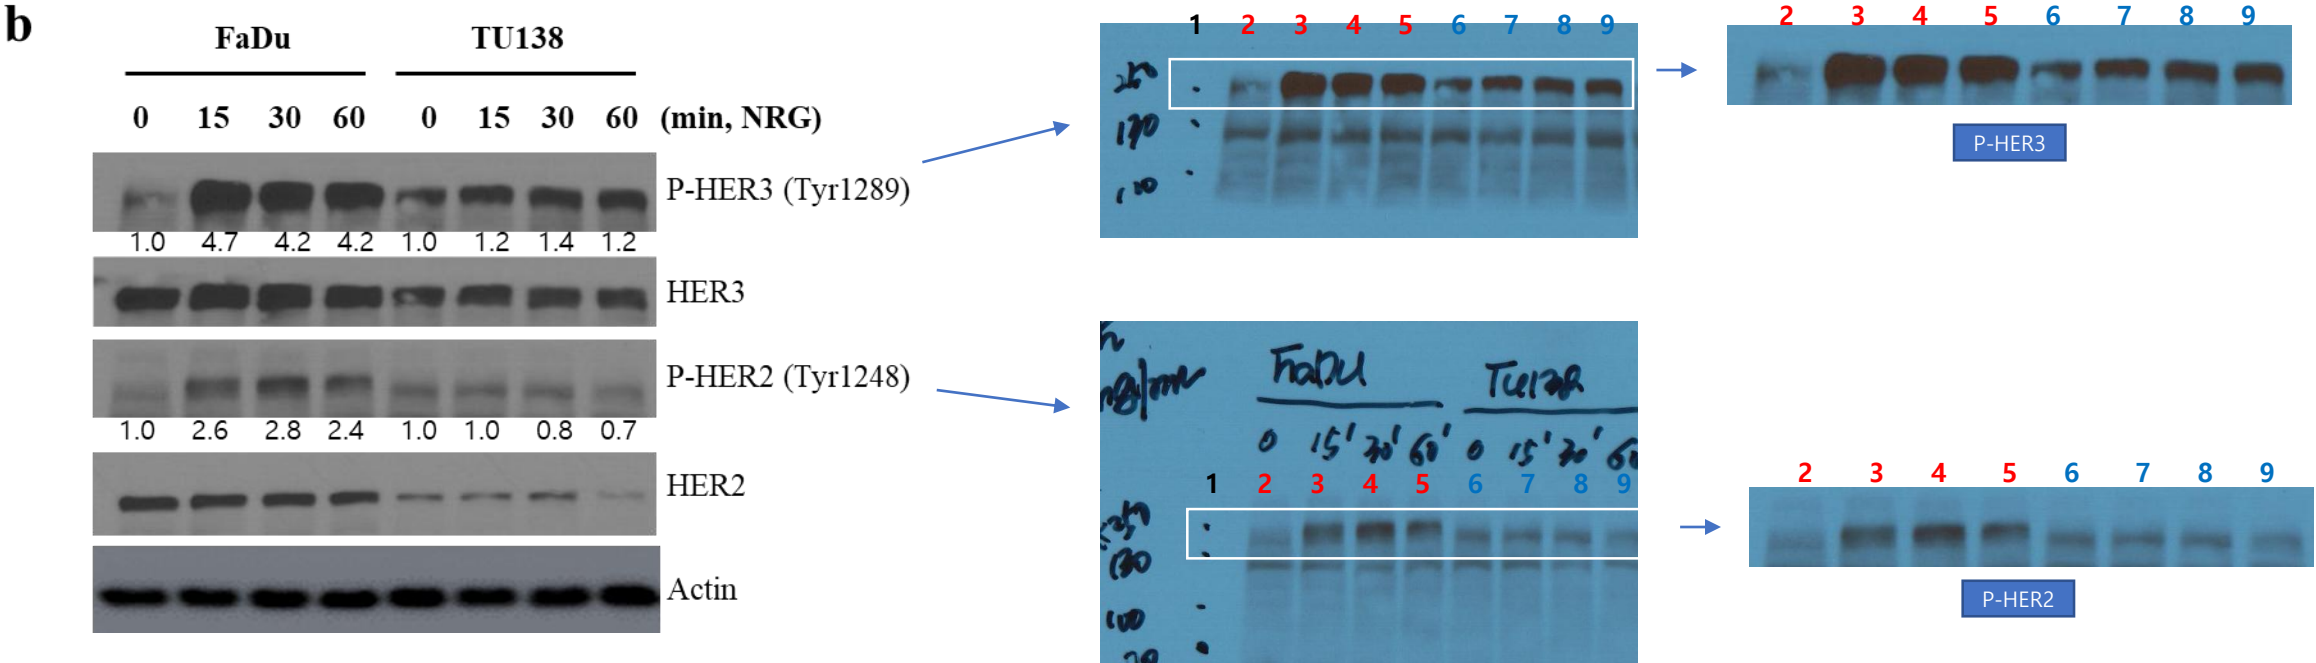

Original image of blots: Figure 2c

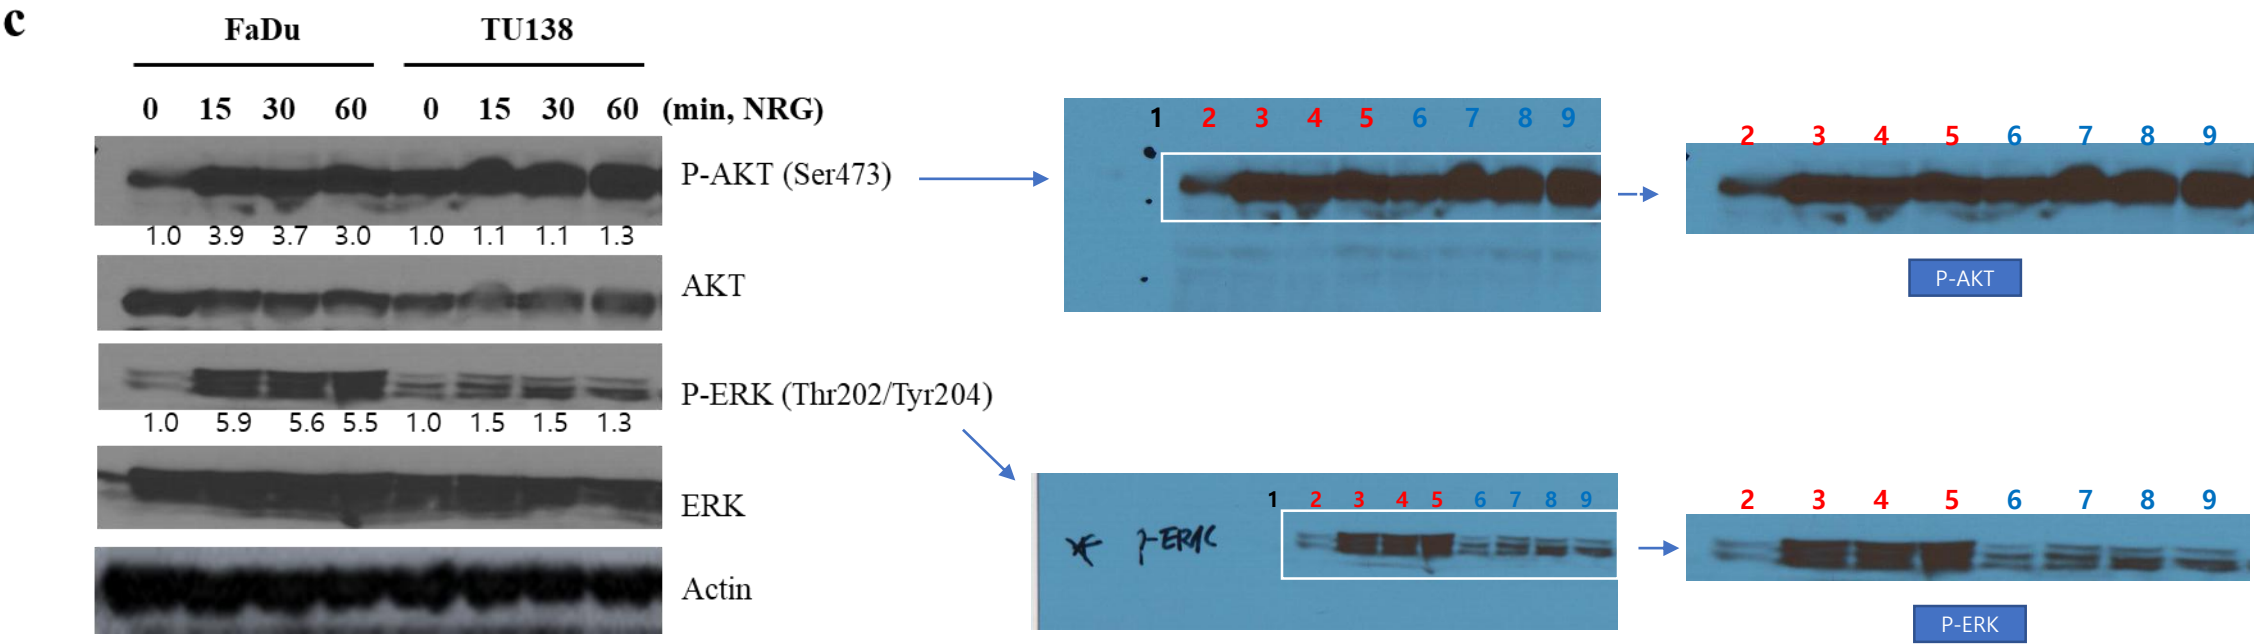

Line 1, size marker;  
Line 2, 0 min; line 3, 15 min; line 4, 30 min; line 5, 60 min in FaDu  
Line 6, 0 min; line 7, 15 min; line 8, 30 min; line 9, 60 min in TU138

Original image of blots: Figure 3a

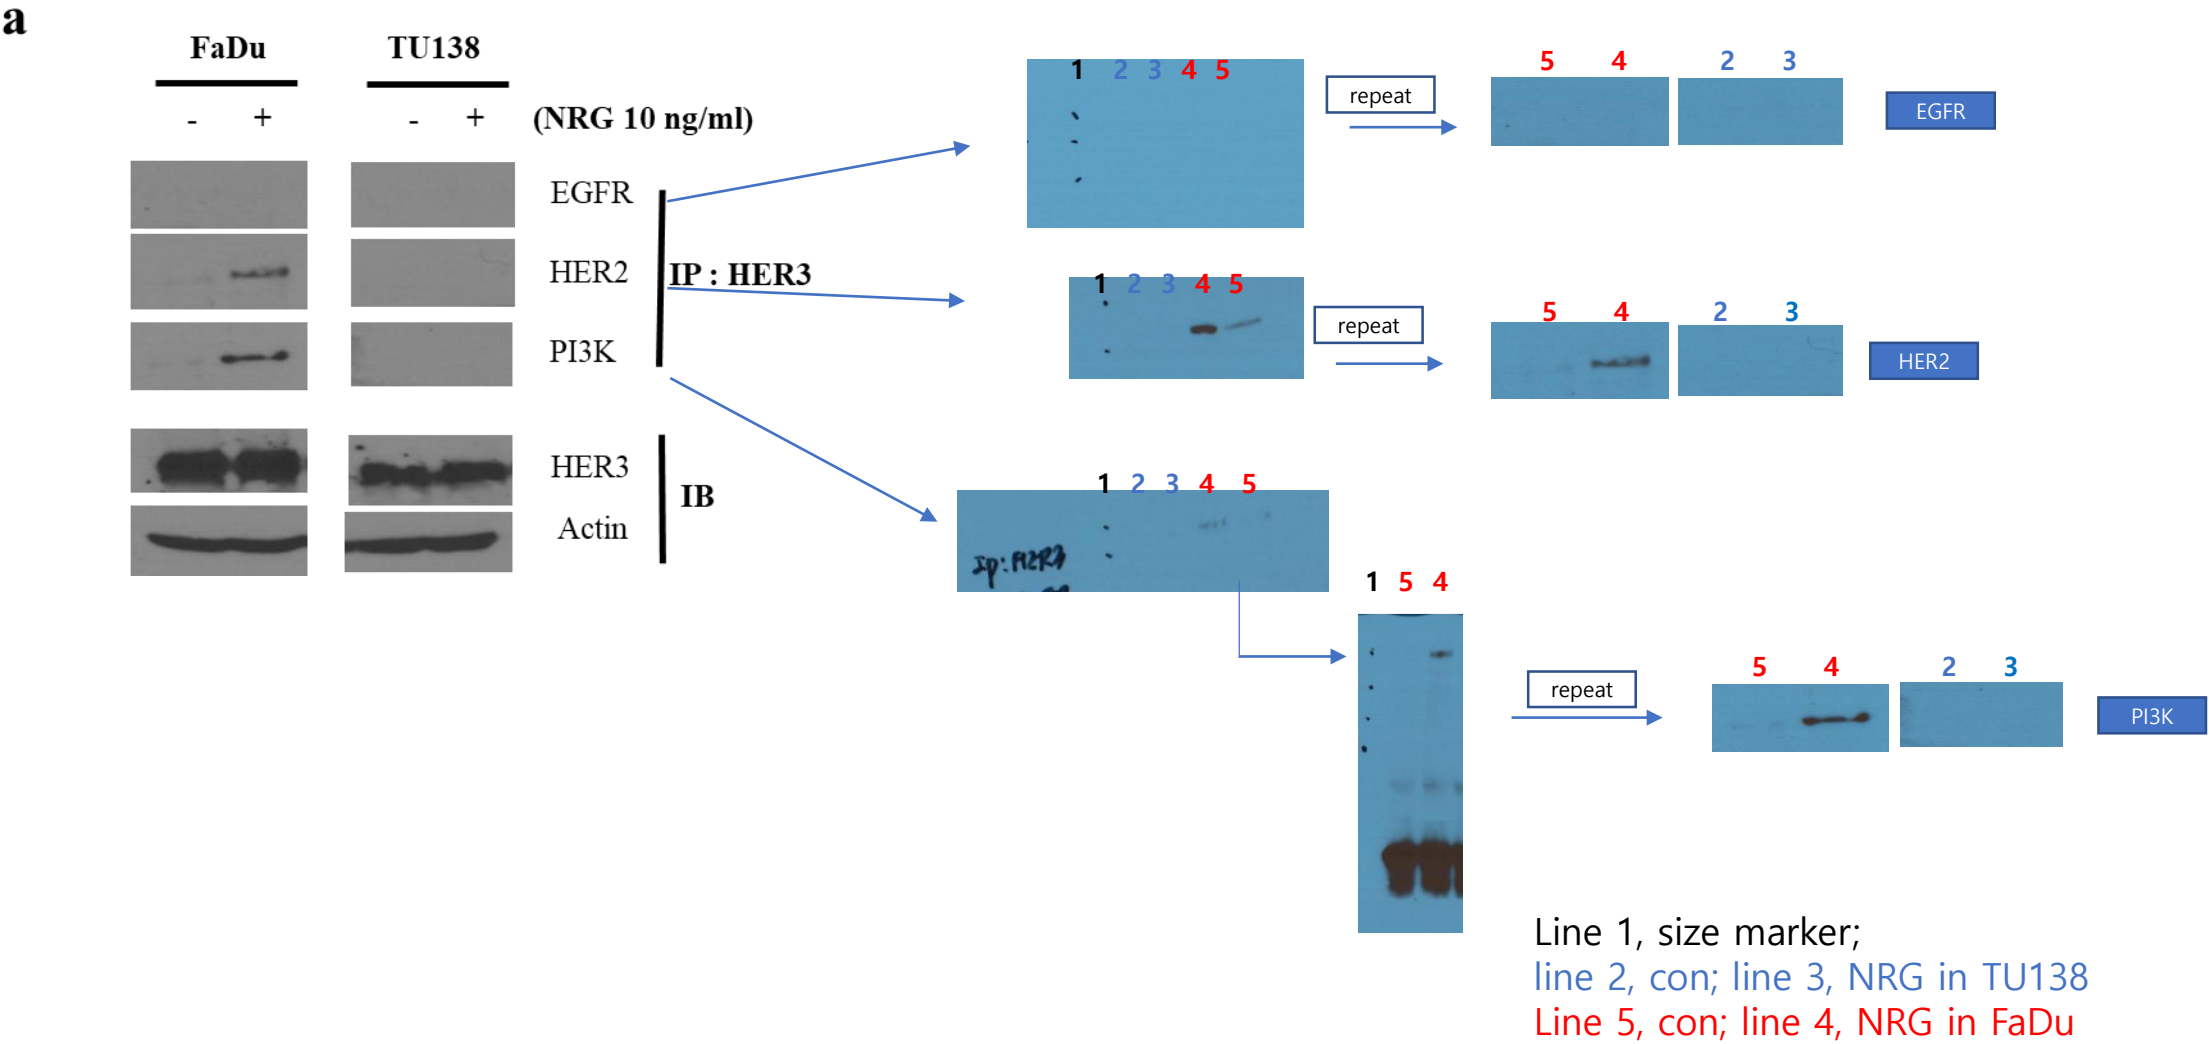

Original image of blots: Figure 3b

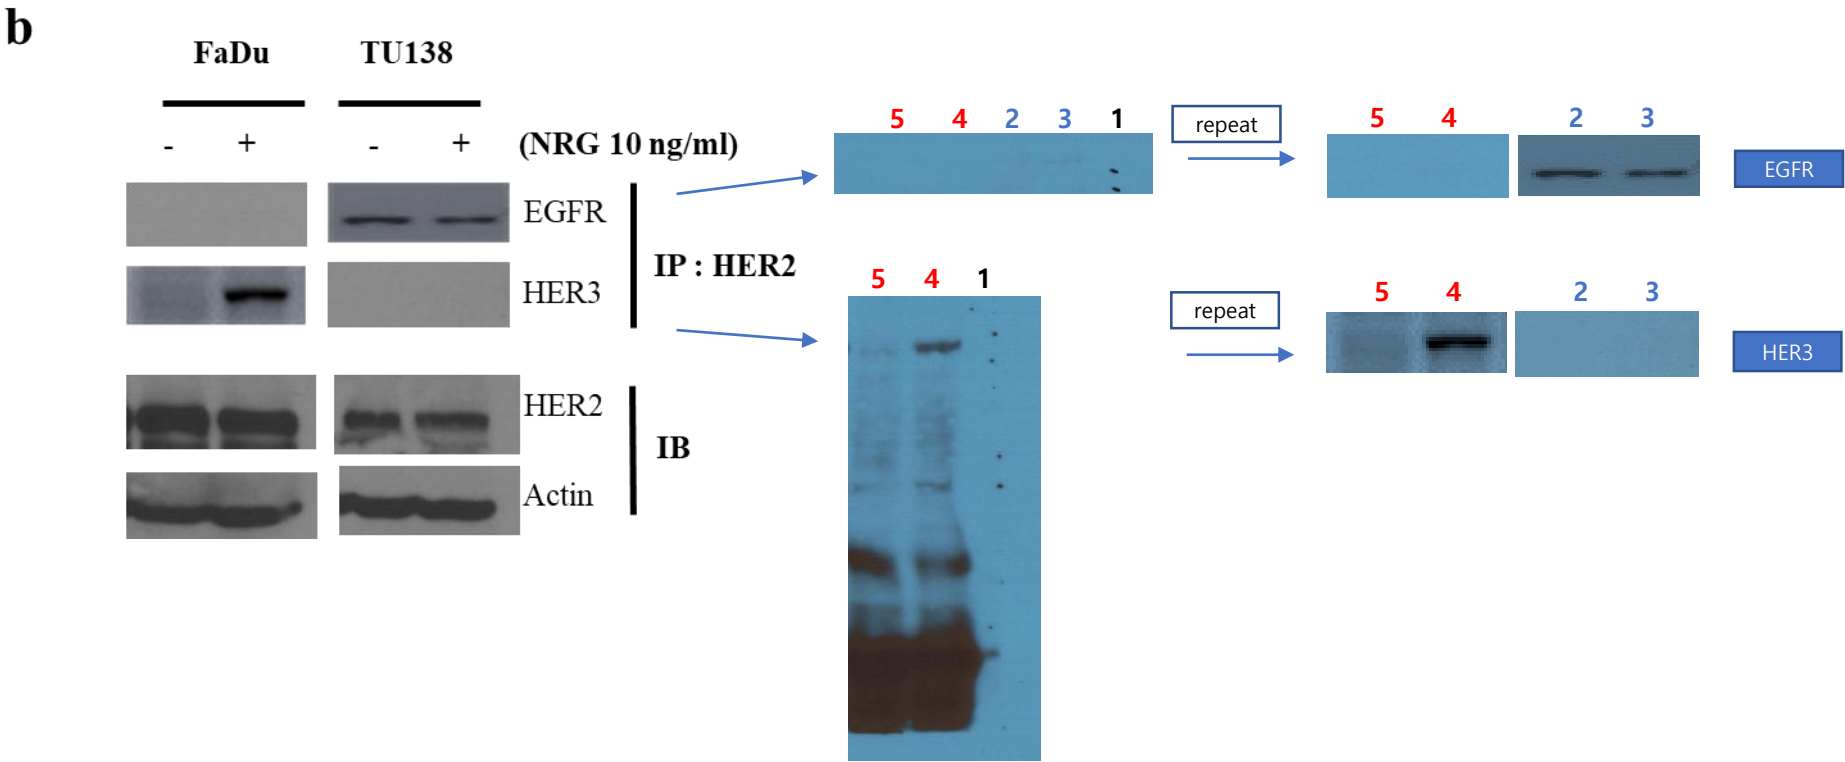

Line 1, size marker;  
Line 2, con; line 3, NRG in TU138  
Line 5, con; line 4, NRG in FaDu

Original image of blots: Figure 3c

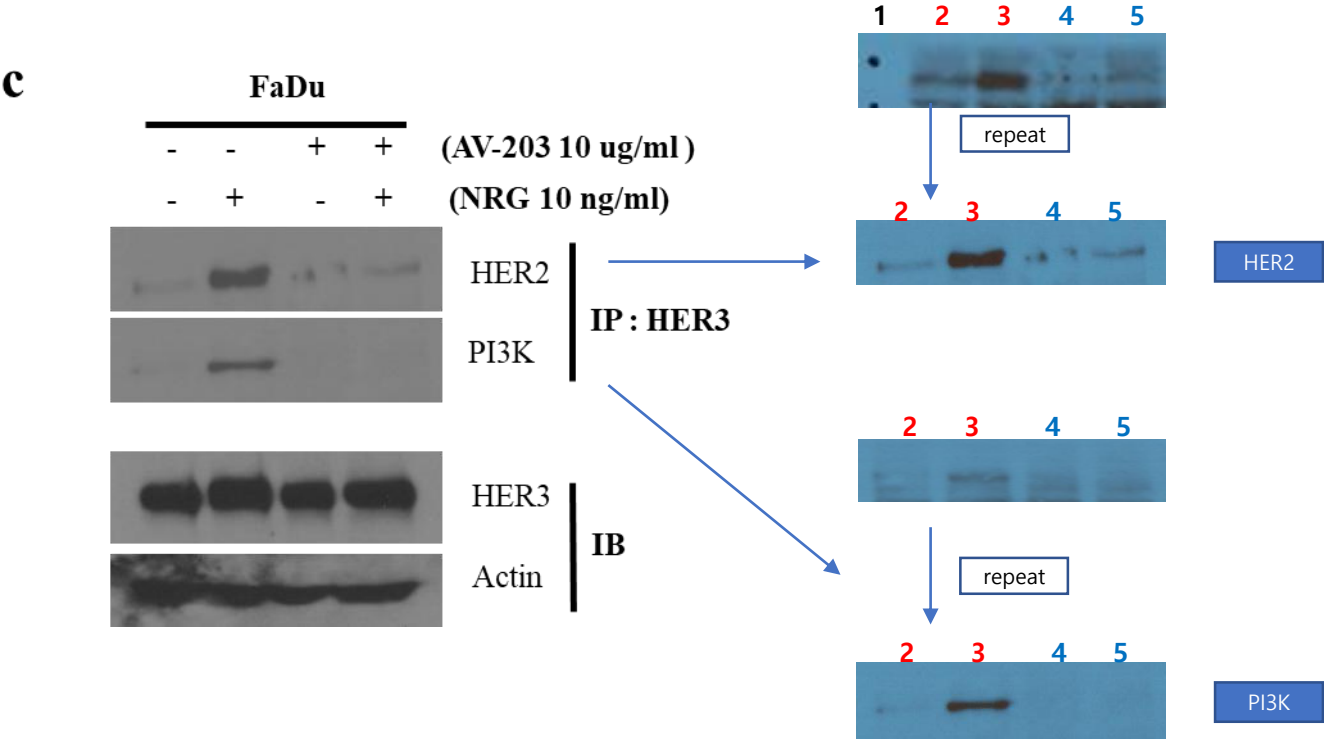

Line 1, size marker;  
Line 2, con; line 3, NRG; line 4, AV-203 alone; line 5, AV-203+NRG in FaDu

Original image of blots: Figure 4a

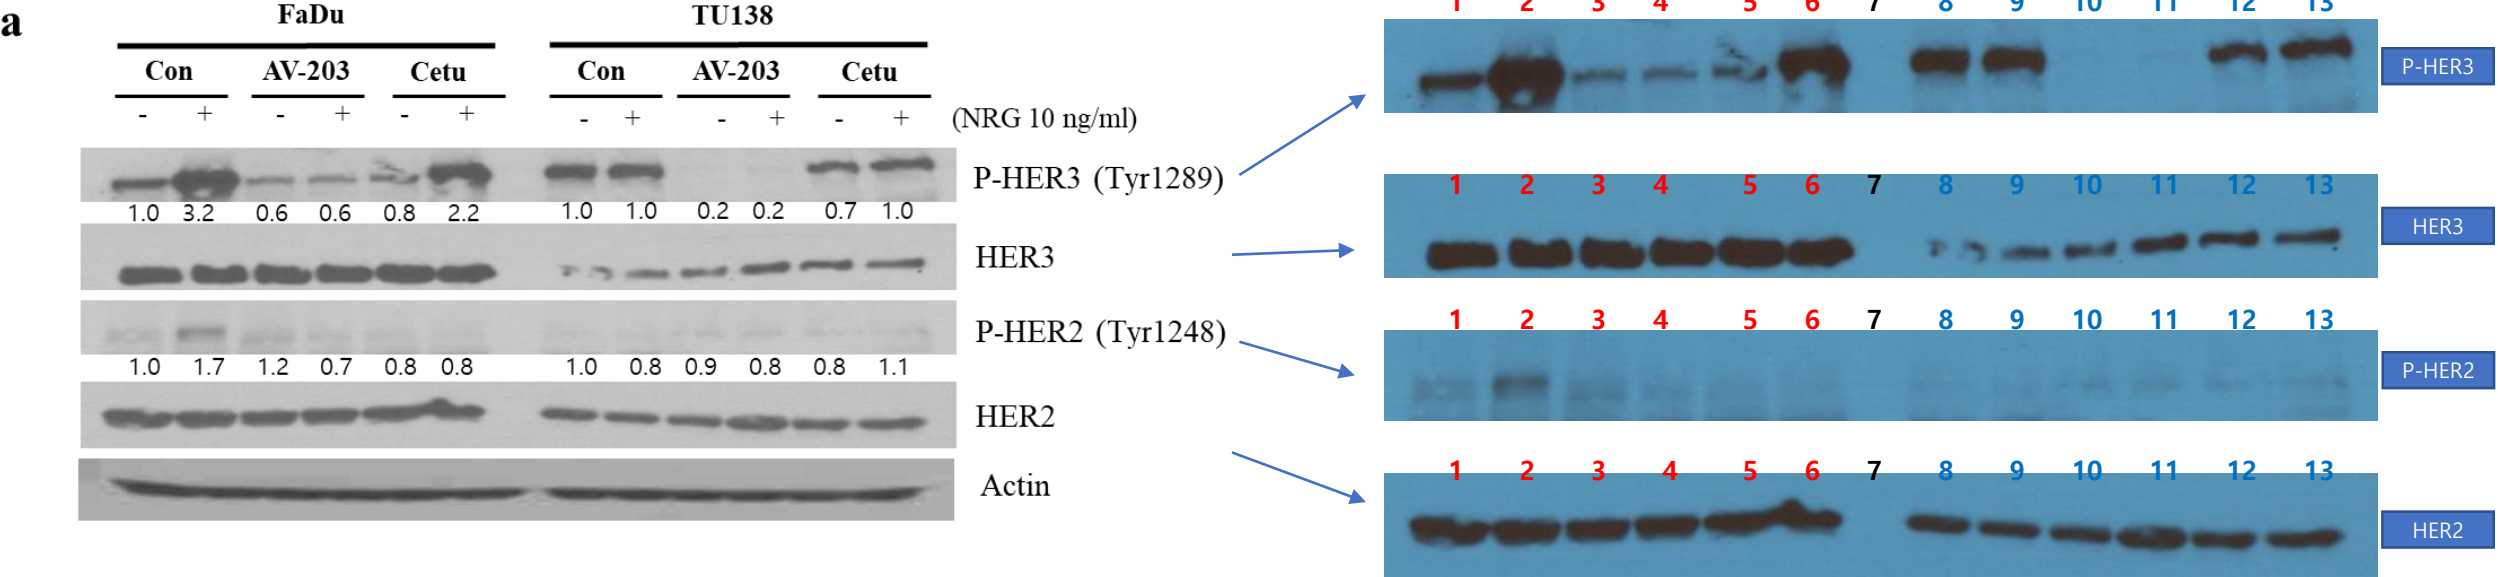

Line 1, con; line 2, NRG; line 3, AV-203 alone; line 4, NRG with AV-203; line 5, Cetu alone; line 6, Cetu with NRG in FaDu  
line 7, space;  
Line 8, con; line 9, NRG; line 10, AV-203 alone; line 11 NRG with AV-203; line 12, Cetu alone; line 13 Cetu with NRG in TU138

Original image of blots: Figure 4b

b

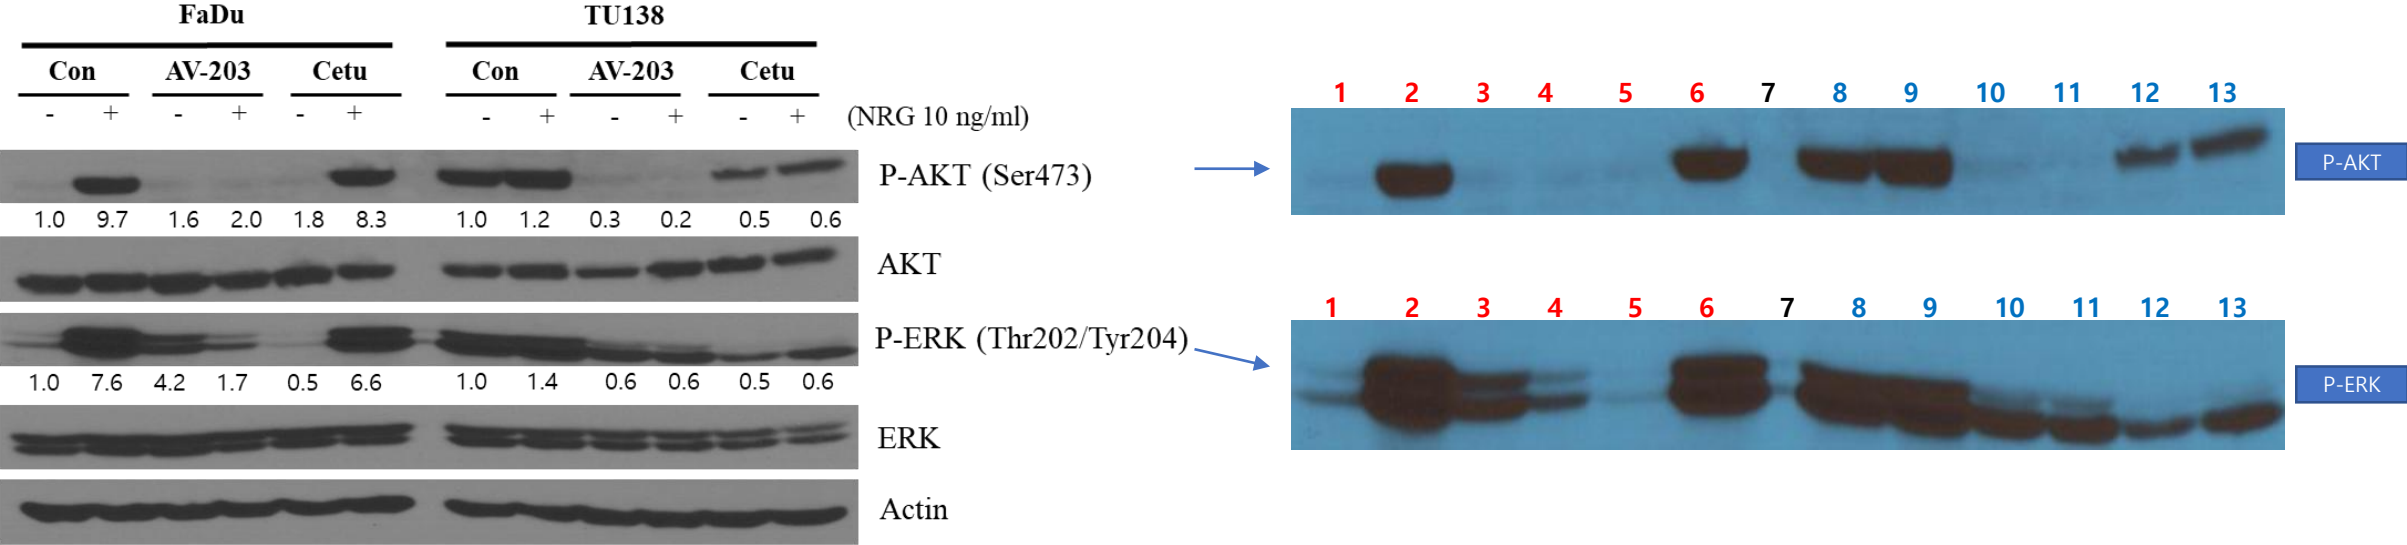

Line 1, con; line 2, NRG; line 3, AV-203 alone; line 4, NRG with AV-203; line 5, Cetu alone; line 6, Cetu with NRG in FaDu  
line 7, space;

Line 8, con; line 9, NRG; line 10, AV-203 alone; line 11 NRG with AV-203; line 12, Cetu alone; line 13 Cetu with NRG in TU138

Original image of blots: Figure 4c

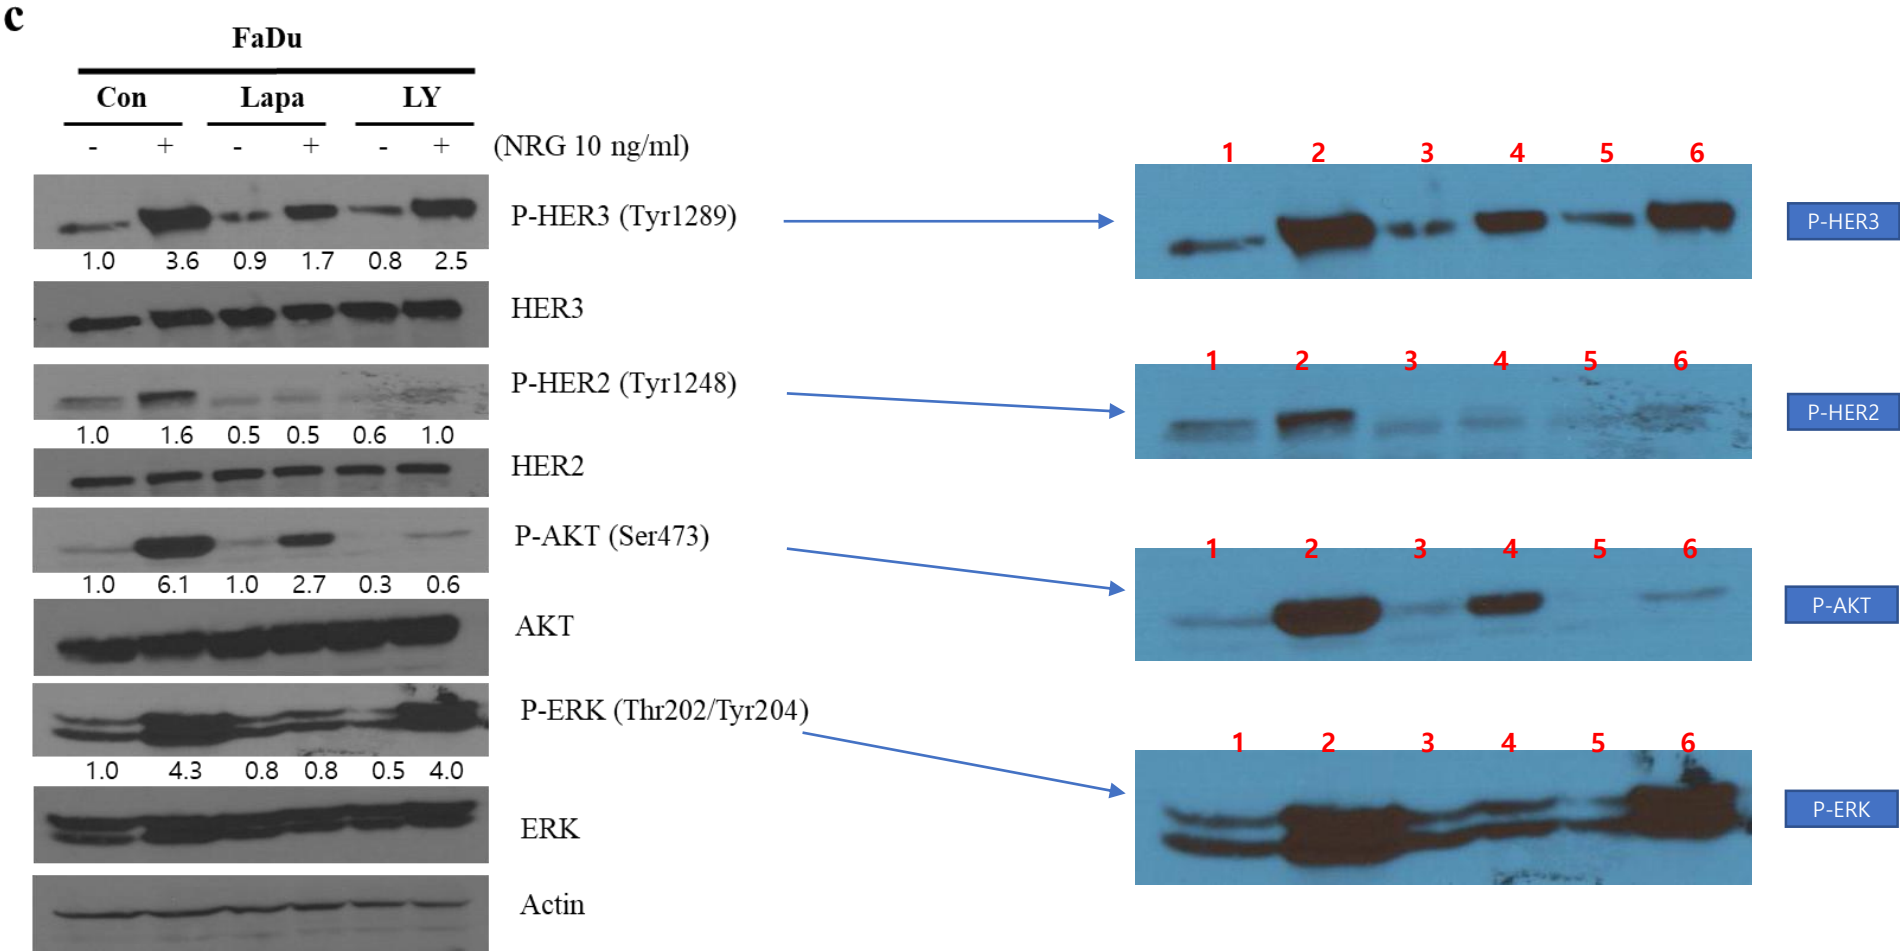

Line 1, con; line 2, NRG; line 3, Lapa alone; line 4, NRG with Lapa; line 5, LY alone; line 6, LY with NRG in FaDu



Original image of blots: Figure 5b

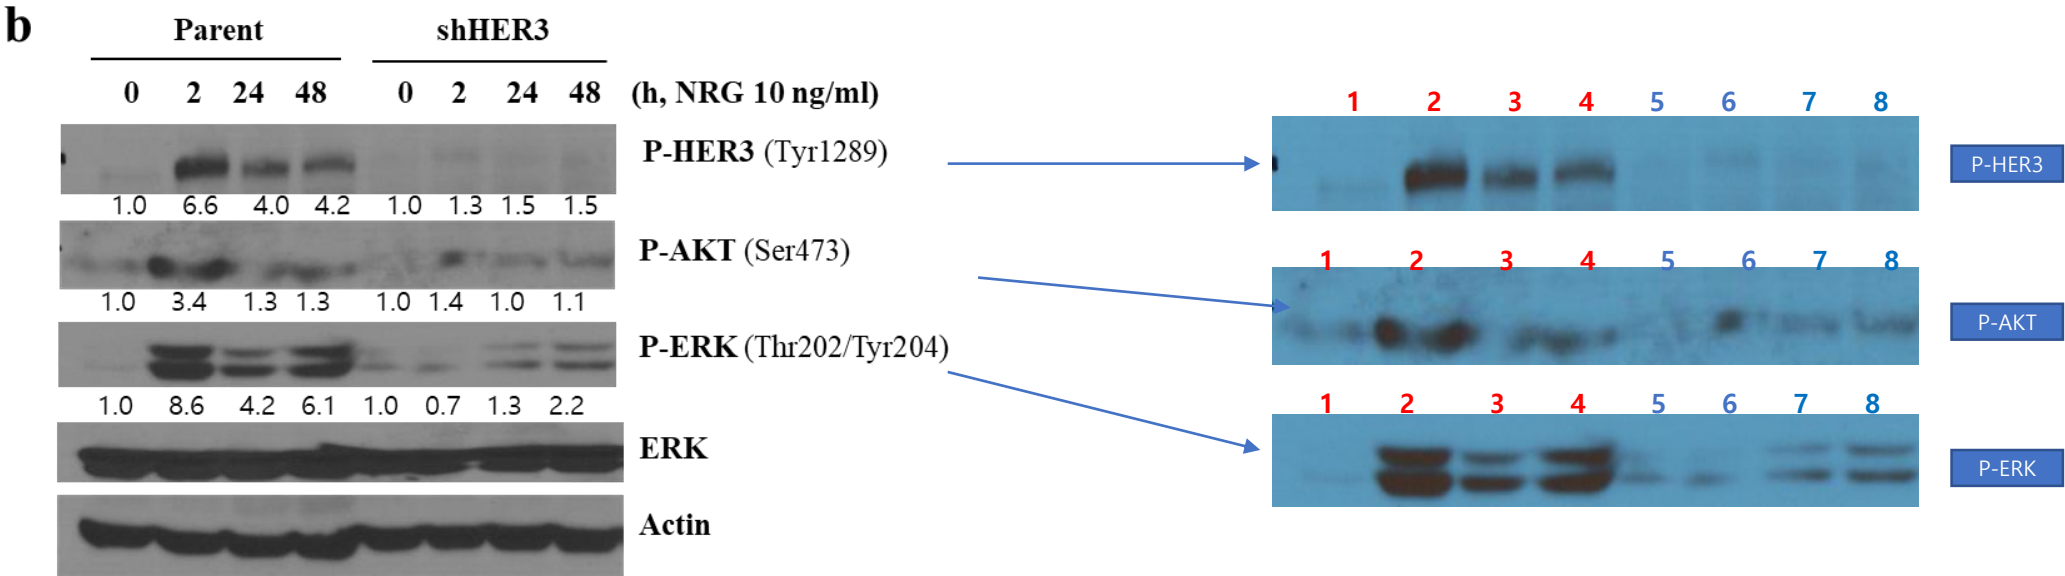

Line 1, 0h; line 2, 2h; line 3, 24h; line 4, 48h in parent/FaDu  
Line 5, 0h; line 6, 2h; line 7, 24h; line 8, 48h in shHER3/FaDu

Original image of blots: Figure 5c, 5d

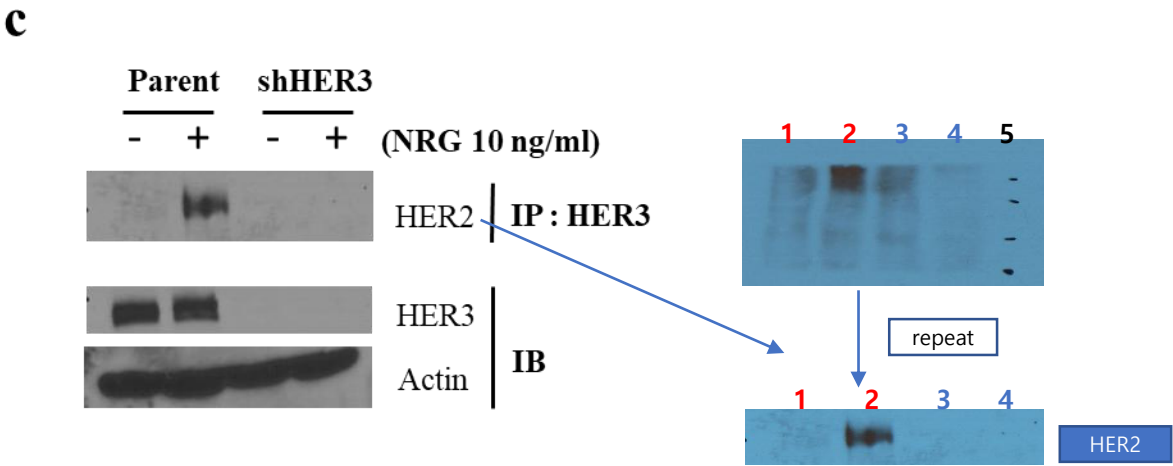

Line 1, con; line 2, NRG in parent/FaDu  
Line 3, con; line 4, NRG in shHER3/FaDu;  
line 5, size marker

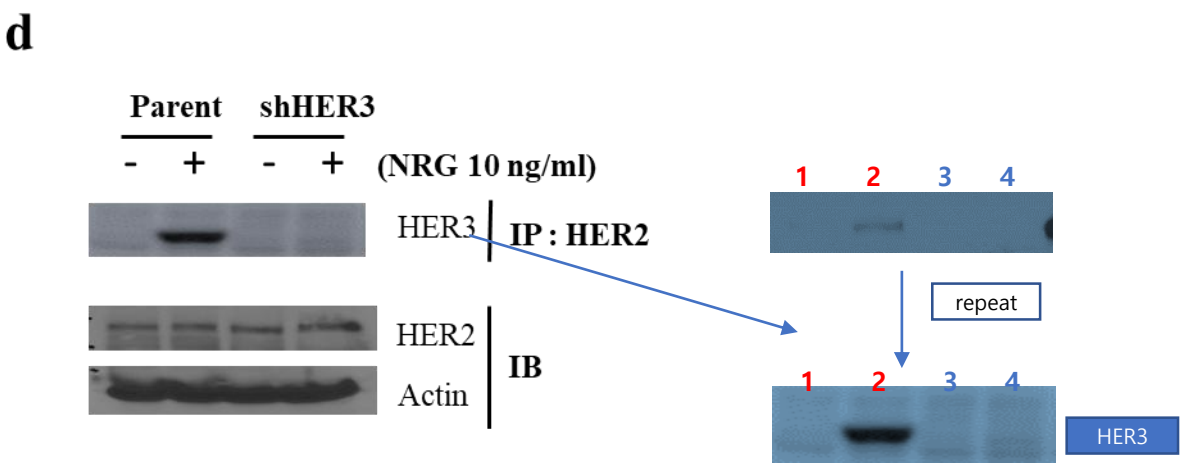

Line 1, con; line 2, NRG in parent/FaDu  
Line 3, con; line 4, NRG in shHER3/FaDu

**a**

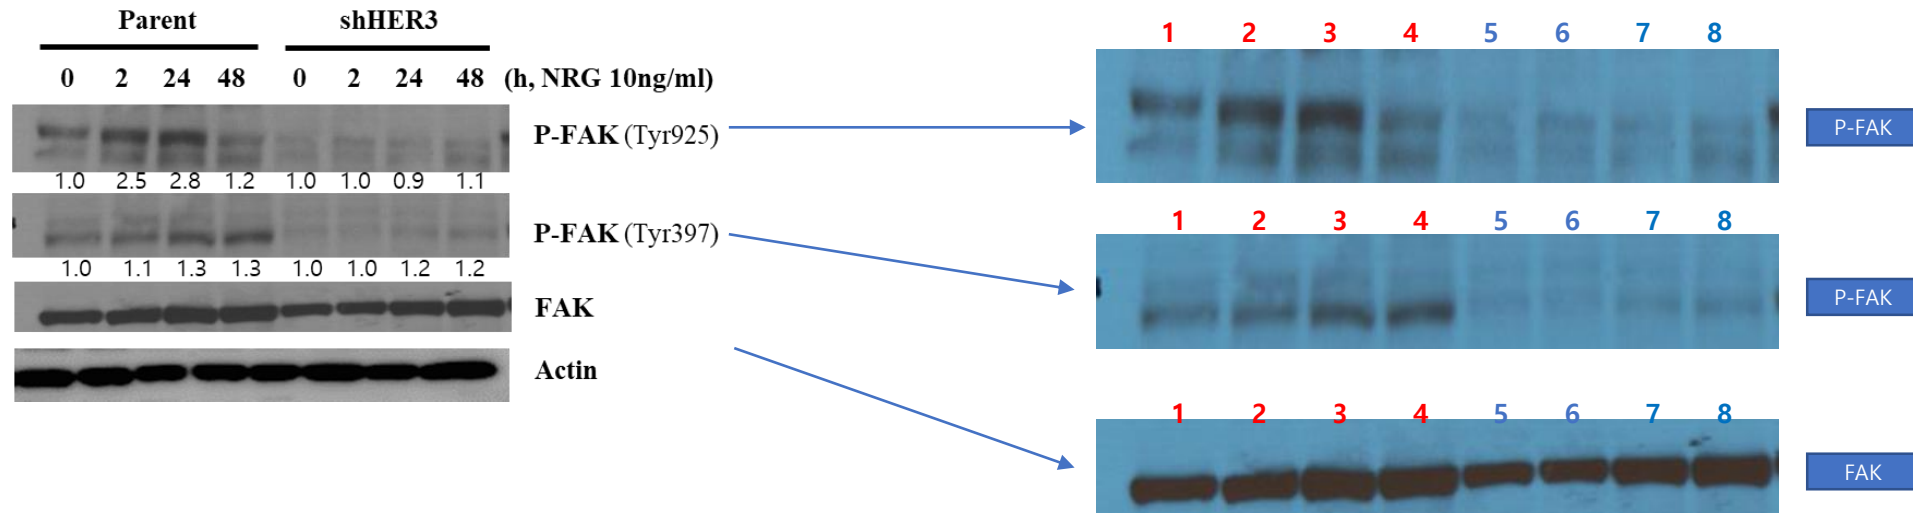

Original image of blots: Figure 6d

d

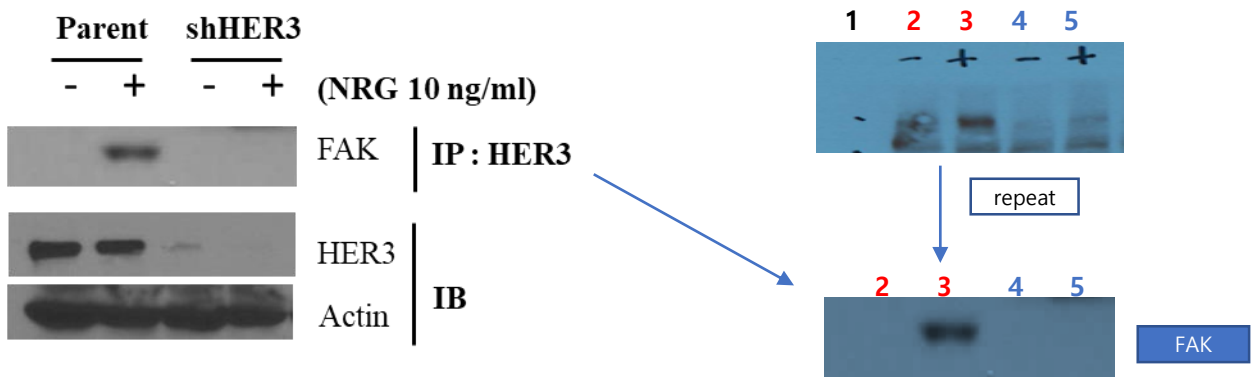

Line 1, size marker;  
Line 2, con; line 3, NRG in parent/FaDu  
Line 4, con; line 5, NRG in shHER3/FaDu
