# Supplementary material for: Neuregulin-Induced HER3 Activation Drives Migration in Head and Neck squamous cell carcinoma via HER2 and FAK Signaling Pathways
Source: Research Square preprint supplement (doi:10.21203/rs.3.rs-5893350/v1), 2025-04-03

**Supplementary Data**

**sFigure legends**

**sFig 1. Effect of DRG activation on cell migration in FaDu cells.**

a) Immunostaining was used to confirm the production of schwann cells (s100) and neurites (PGP95). b) Migration was measured after 24h on active DRG and inactive DRG with FaDU cells.

**sFig 2. HER3 and NRG1 expression on HNSCC.**

Western blotting was used to analyze the levels of NRG1 and HER3 in SCC61, Cal33, HN5, FaDU and TU138 cells.

**sFig 3. Effects of NRG on HER3-AKT pathway in TU138 cells.**

TU138 cells were treated with NRG for 30 min and and pre-treated with either 1 μM Lapa (Lapatinib) or 1 μM LY (LY294002) for 30 minutes. Cell lysates were analyzed by western blotting for phosphorylation of HER3 (P-HER3), HER2 (P-HER2), AKT (P-AKT), and ERK (P-ERK).

**sFig. 4. Effects of NRG on migration in siFAK transfected cells.**

Western blotting was used to analyze the levels of FAK in siCon and siFAK transfected cells.

**sFig. 1a and 1b**


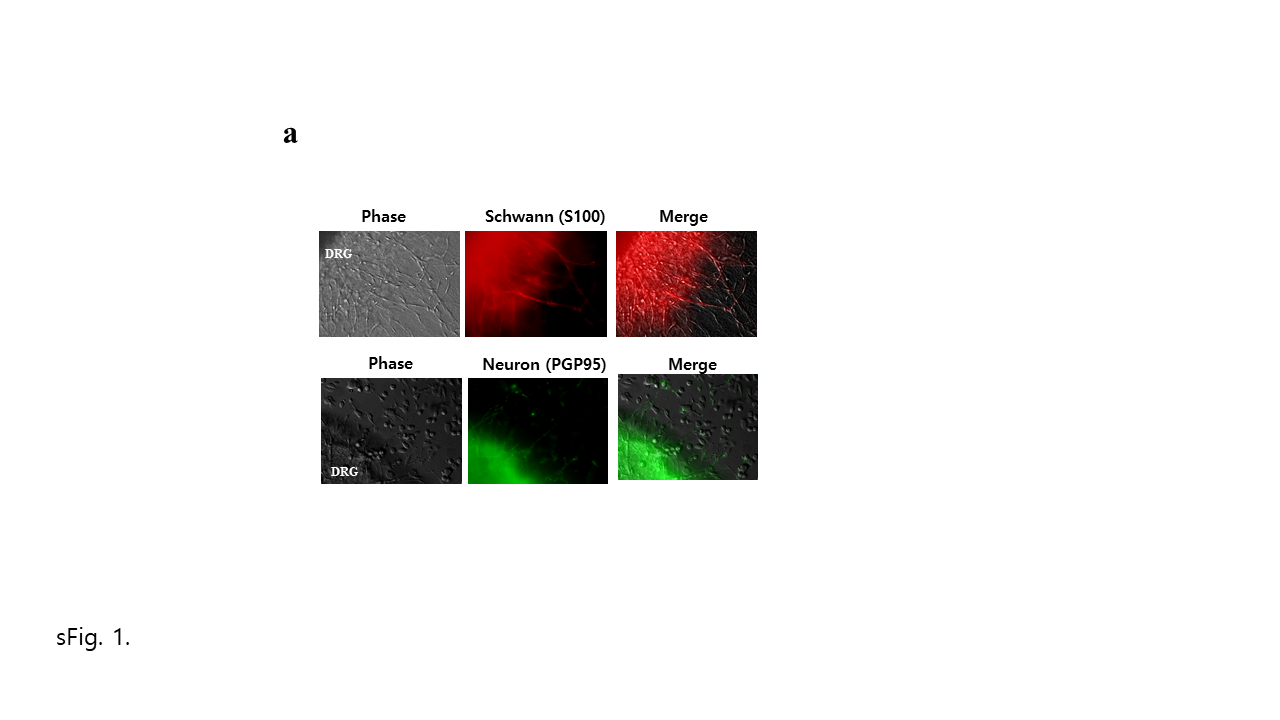

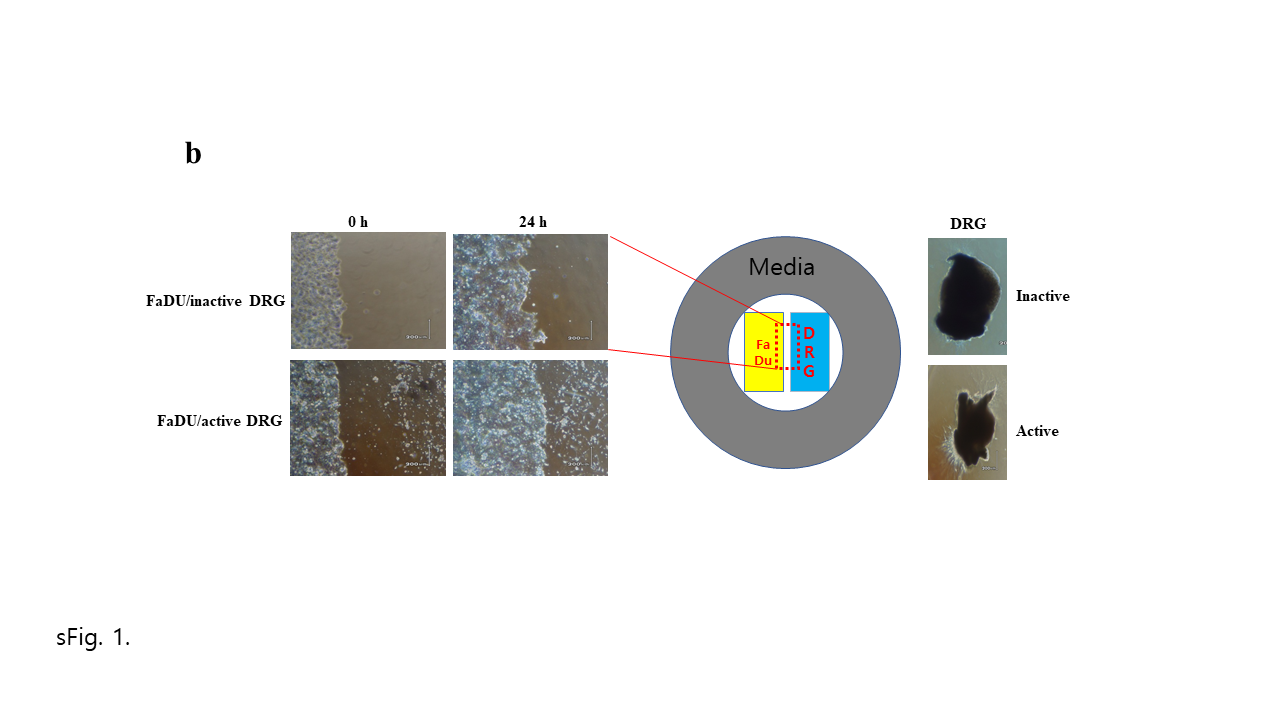


**sFig. 2**


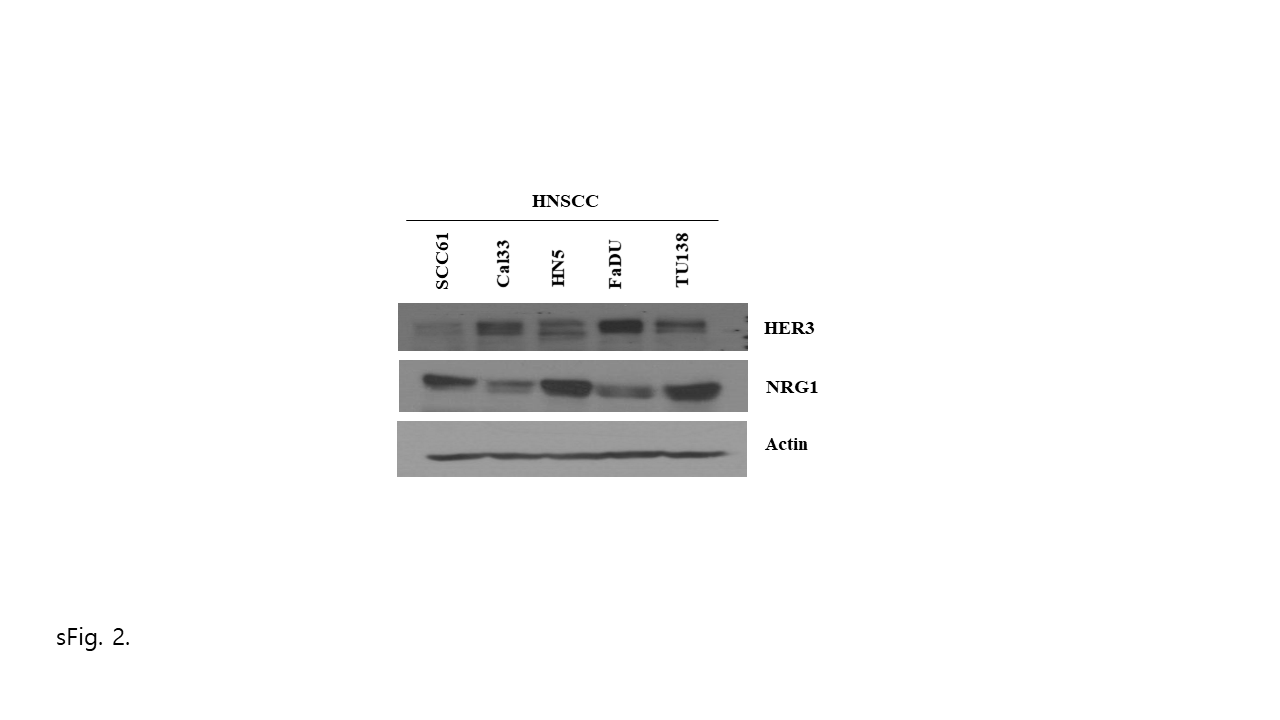


**sFig. 3**


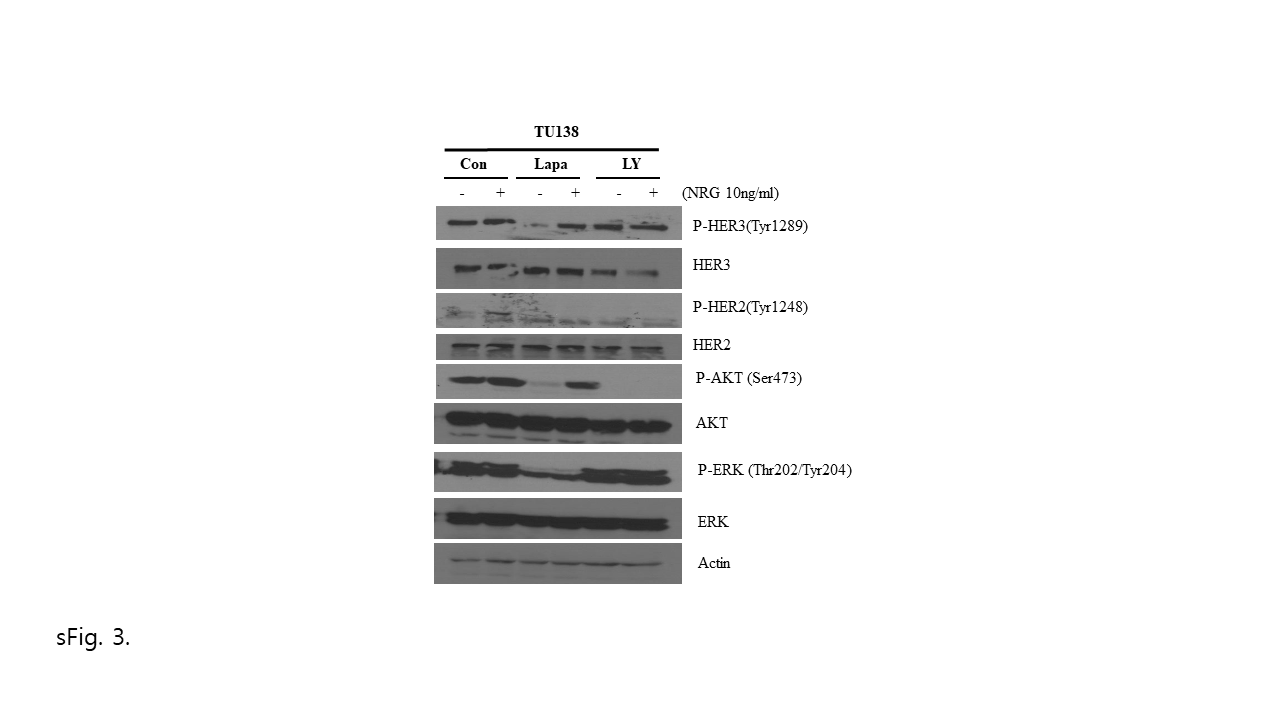


**sFig. 4**


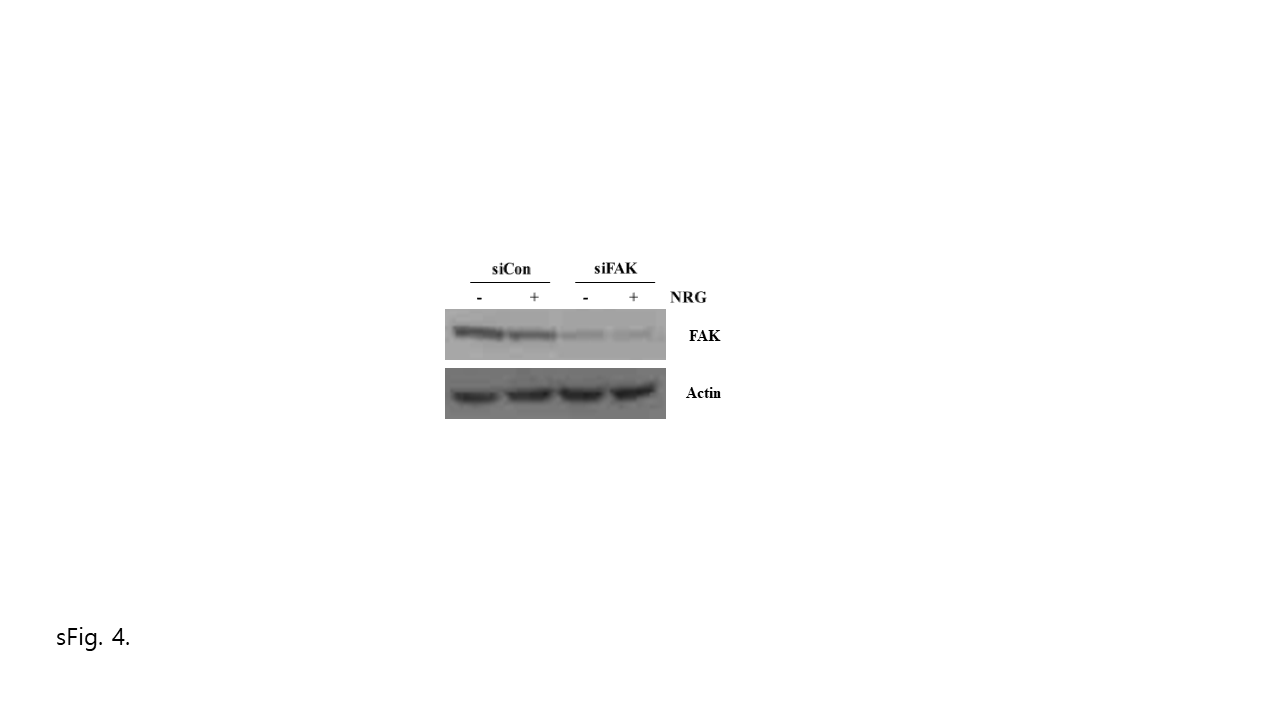

Supplement: Supplementary file 1 [file e772190fdd782dc2a6fa5a9b.docx]
